# Supplementary material for: Local bias induced ferroelectricity in manganites with competing charge and orbital order states
Source: Royal Society of Chemistry journal article supplement (doi:10.1039/c4cp00075g), 2014-01-01
Supplement: c4cp00075g.pdf [file c4cp00075g.pdf]

# Local Bias Induced Ferroelectricity in Manganites With Competing Charge and Orbital Order States - Supplementary Info

Fábio G. N. Figueiras<sup>\*a</sup>, Igor K. Bdikin<sup>b</sup>, Vitor B. S. Amaral<sup>a</sup> and Andrei L. Kholkin<sup>c</sup>

Received (in XXX, XXX) Xth XXXXXXXXXX 2013, Accepted Xth XXXXXXXXXX 2013

DOI: 10.1039/b000000x

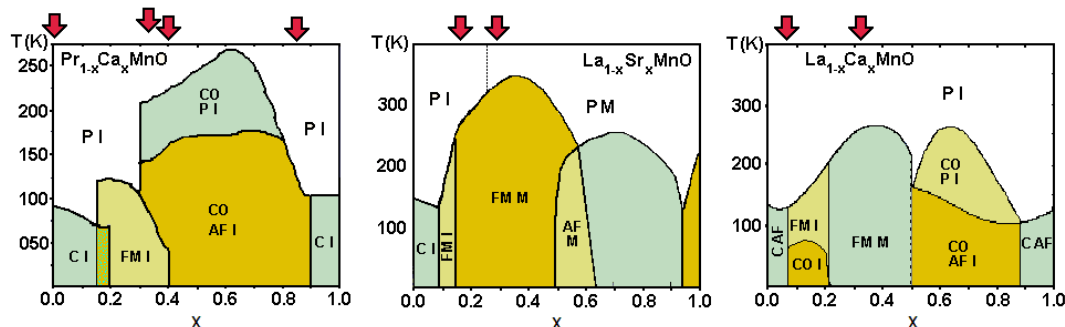

**Fig. 0:** Phase diagrams as function of doping ( $x$ ) and temperature for Manganites:  $\text{Pr}_{1-x}\text{Ca}_x\text{MnO}_3$  [4] (left)  $\text{La}_{1-x}\text{Sr}_x\text{MnO}_3$  [14] (center) and  $\text{La}_{1-x}\text{Ca}_x\text{MnO}_3$  [3] (right), showing samples composition positioning (top arrows). Acronyms: P paramagnetic, AF antiferromagnetic, FM ferromagnetic, M metallic, I insulator, CO charge order, C spin canted arrangements.

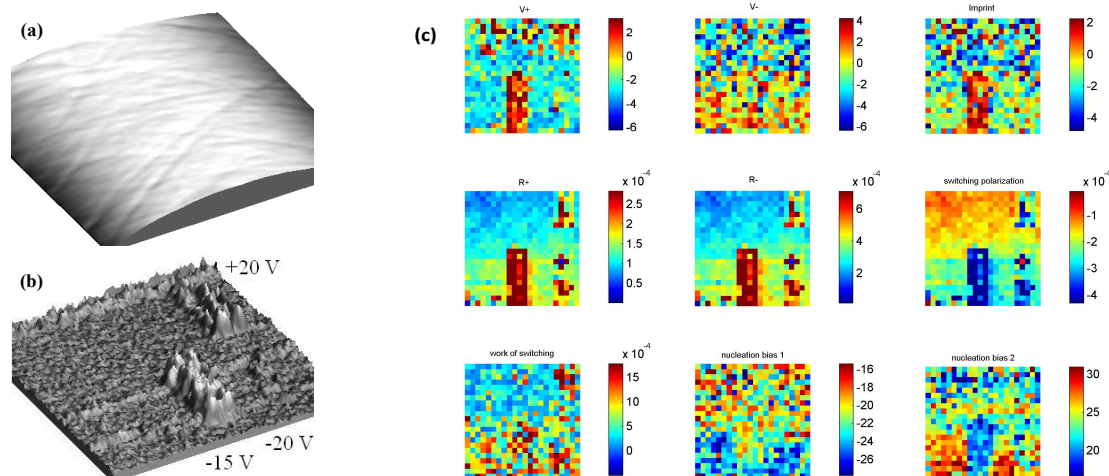

**Fig. 3:** Topographic (a) and piezo contrast (b) scans of  $3 \times 3 \mu\text{m}^2$  surface after performing bias lithographic paths; detail of the respective BEPS maps results (c) for the single crystal  $\text{Pr}_{0.60}\text{Ca}_{0.40}\text{MnO}_3$  sample.

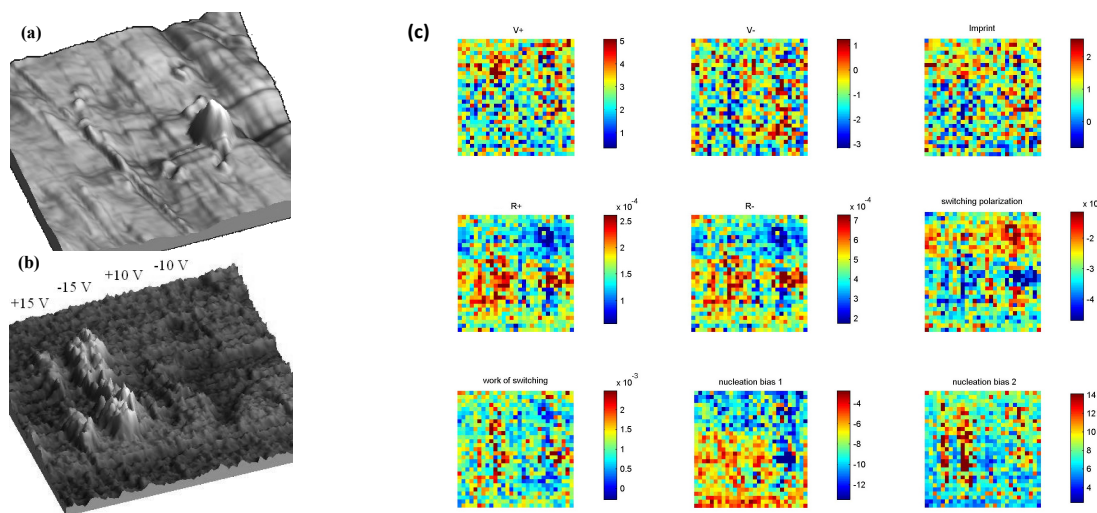

**Fig. 4:** Topographic (a) and piezo contrast (b) scans of  $3 \times 3 \mu\text{m}^2$  surface after performing bias lithographic paths; detail of the respective BEPS maps results (c) for the single crystal  $\text{La}_{0.89}\text{Sr}_{0.11}\text{MnO}_3$  sample.
